# Supplementary material
Source: publisher figshare collection journal article supplement (https://tandf.figshare.com/articles/dataset/_/26310043)
Supplement: Supplementary file 1 [file 1]

**Development of Embedded-Atom Method (EAM) Potential for Palladium-Barium Alloy**

Snehanshu Pal1, *, Sankhasubhra Mukhopadhyay2

1Department of Metallurgy and Materials Engineering, Indian Institute of Engineering Science and Technology, Government of India, Howrah-711103, West Bengal, India.

2Department of Metallurgical and Materials Engineering, National Institute of Technology Rourkela, 769008, Odisha, India.

*Corresponding author: Snehanshu Pal, email id: [snehanshu@metal.iiests.ac.in](mailto:snehanshu@metal.iiests.ac.in); [snehanshu.pal@gmail.com](mailto:snehanshu.pal@gmail.com); Tel.: +919692595649.

**Codes for using the EAM potential in LAMMPS:**

In the interatomic potential section of the LAMMPS code, the below two lines must be given -

>>pair_style eam/alloy

>>pair_coeff * * BaPd_SPSM.EAM Ba Pd

The name of the developed EAM potential file is ‘BaPd_SPSM_EAM.txt’. The file extension should be ‘.EAM’ while using this in the LAMMPS code. The elements are Barium (Ba) and Palladium (Pd).

**Diffusion coefficients at low temperatures:**

Diffusion coefficients for Ba, Pd, and BaPd2 at 77K, and 87Kare listed in TABLE VI.

| T (K) | D_Ba ( m2/s ) | D_Pd ( m2/s ) | D_BaPd2 ( m2/s ) |
| --- | --- | --- | --- |
| 77 | 3.664×10-12 | 2.946×10-12 | 2.637×10-12 |
| 87 | 3.810×10-12 | 4.207×10-12 | 3.864×10-12 |

**TABLE VI –** Data of diffusion coefficient (D) for 77K, and 87K.
